# Supplementary material
Source: PubMed Central journal article supplement (PMC8733534)

**Household interview**

1. Address: \_\_\_\_\_
  2. How many people were living in this house over the past 2 days? \_\_\_\_\_
  3. Were any animals staying here over the past 2 days? \_\_\_\_\_
  4. (if yes) What type of animal? How many? \_\_\_\_\_
  5. We are counting total human hours outside the house in the yard. How much time have people spent outside in your yard today, added all together? \_\_\_\_\_ (If prompting is needed, say "For example, if 2 people spent one hour outside so far today, that would be 2 hours")
  6. How much time did people spend outside in your yard yesterday? \_\_\_\_\_
  7. How much time did people spend outside in your yard 2 days ago? \_\_\_\_\_
  8. How much time did your pet(s) spend outside in your yard today? \_\_\_\_\_  
Yesterday? \_\_\_\_\_ 2 days ago? \_\_\_\_\_  
*\*\*\*\* Separate by type of animal; ie collect info separately for cats and dogs but add together time for 2 dogs.*
  9. Did people wear mosquito repellent when they went outside over the past 2 days? (If yes, prompt "Always, usually or sometimes?"  
 Always  Usually  Sometimes  Rarely  Never
  10. Did you do anything else to avoid mosquito bites, such as use insecticides during the last week? \_\_\_\_\_  
\_\_\_\_\_
- 

Were windows open? Y / N

Did they have screens? Y / N

Were doors open? Y / N

Did they have screen doors? Y / N

## Supplemental Material S2. New York *Aedes albopictus* colony details

Eggs were collected in the field in 2019 for another study by Talya Shragai (Shragai 2020). Mosquitoes were reared in separate colonies by location for a few generations and then combined into one NY colony.

The mosquitoes utilized in the life table had been in laboratory colony (sum of generations passed in location-specific and general NY colonies) for between 6 (replicate 1) and 10 (replicate 4) generations.

Eggs were collected from the following sites:

| County      | Site Name     |
|-------------|---------------|
| Westchester | Yonkers       |
| Rockland    | Spring Valley |
| Suffolk     | Babylon       |
| Suffolk     | Central Islip |
| Suffolk     | Smithtown     |

The Babylon and Central Islip sites were the same as those sampled in our study. Smithtown is also on Long Island and Yonkers and Spring Valley are in the Hudson Valley, within 15 km of Long Island. The Spring Valley site is approximately 78 km from the furthest East site in our study. The distance between the furthest west and furthest east blood meal collection sites in our study is 40 km. Therefore, this colony encompasses mosquitoes from a larger geographic area in NY compared to the blood meal analysis collection sites.

### Supplemental Table S1

Mean ( $\pm$  SE) number of blood meals, residents, and time spent outside for humans, cats and dogs per residential property sampled

| Host (N)*  | Mean ( $\pm$ SE) per property |                     |                                                 |
|------------|-------------------------------|---------------------|-------------------------------------------------|
|            | Blood meal/ property          | Residents/ property | Time spent outside (min)/ property <sup>†</sup> |
| Human (27) | 0.96 (0.21)                   | 3.18 (0.36)         | 234.26 (49.83)                                  |
| Cat (21)   | 0.75 (0.17)                   | 0.39 (0.19)         | 278.74 (232.93)                                 |
| Dog (5)    | 0.18 (0.09)                   | 0.29 (0.10)         | 53.61 (22.05)                                   |

\* N = total number of blood meals identified to host type from residential sites

<sup>†</sup> Mean ( $\pm$  SE) of within household sum of time spent outside by all residents of a given host type according to self-reported household interview data

### Supplemental Table S2

Abundance and time-weighted host feeding indices for blood fed *Ae. albopictus* collected on residential properties

| Index                         | Human vs Cat | Human vs Dog | Cat vs Dog |
|-------------------------------|--------------|--------------|------------|
| HFI*                          | 0.16         | 0.49         | 3.05       |
| HFI <sub>T</sub> <sup>†</sup> | 0.20         | 0.14         | 0.73       |

\*Calculated with mean number of blood meals and residents per residential property sampled

† Calculated with mean number of blood meals, residents and mean time spent outside per residential property sampled

### **Supplemental Figure legends:**

#### **Figure S1. Site map**

Google Earth satellite image of Long Island (as displayed in June 2021). Yellow triangles represent residential sites and orange squares represent farm sites.

#### **Figure S2. Distribution of blood meals by site type**

Distribution of *Ae. albopictus* blood meal source by sampling site: residential (n=4) and farm (n=4).

**Figure S3.** Box plot of average time spent outside (min) by each animal type per residential property (n=28).

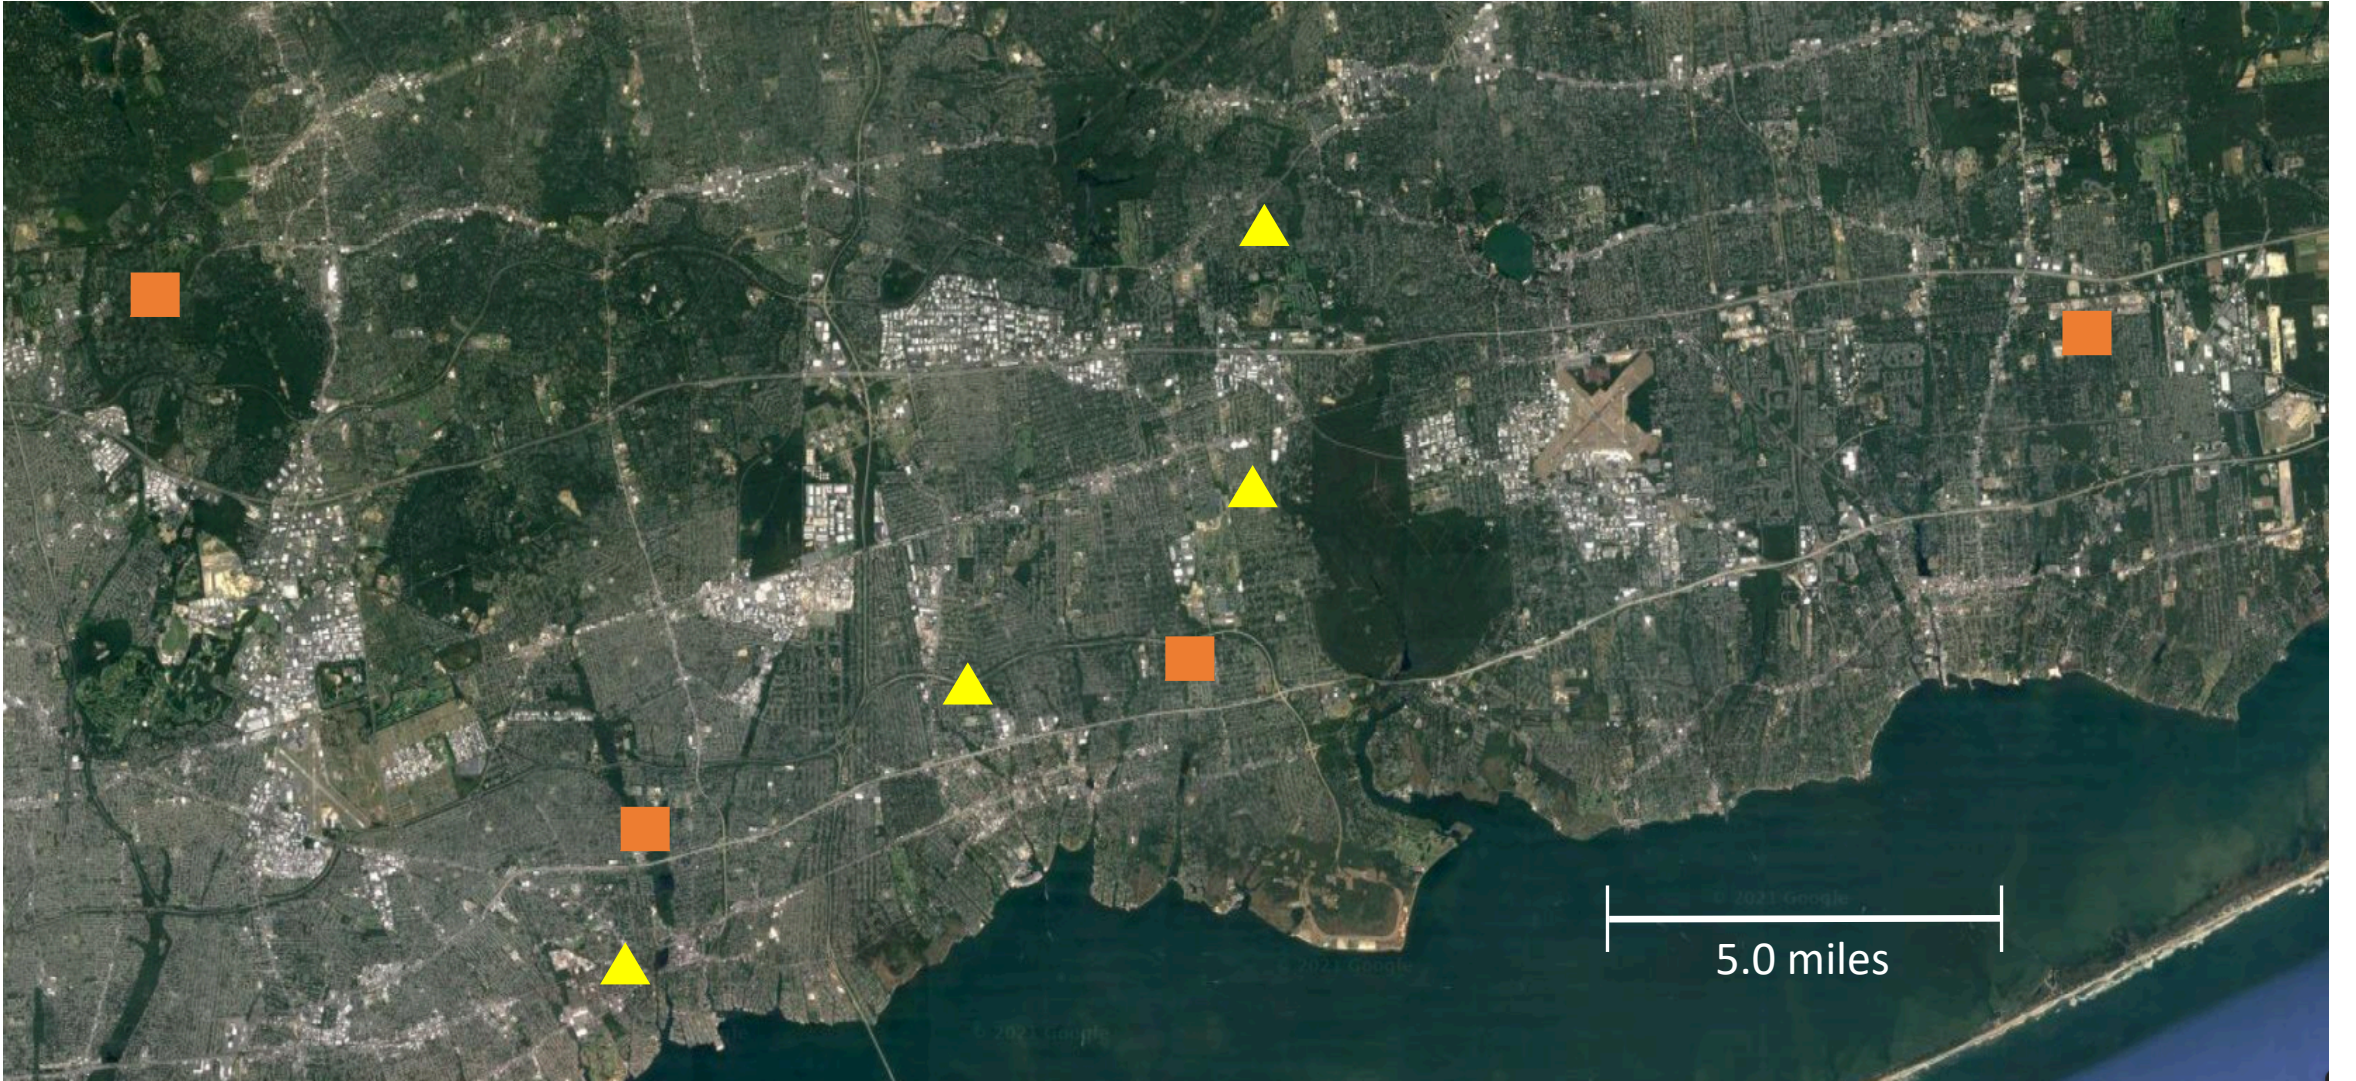

5.0 miles

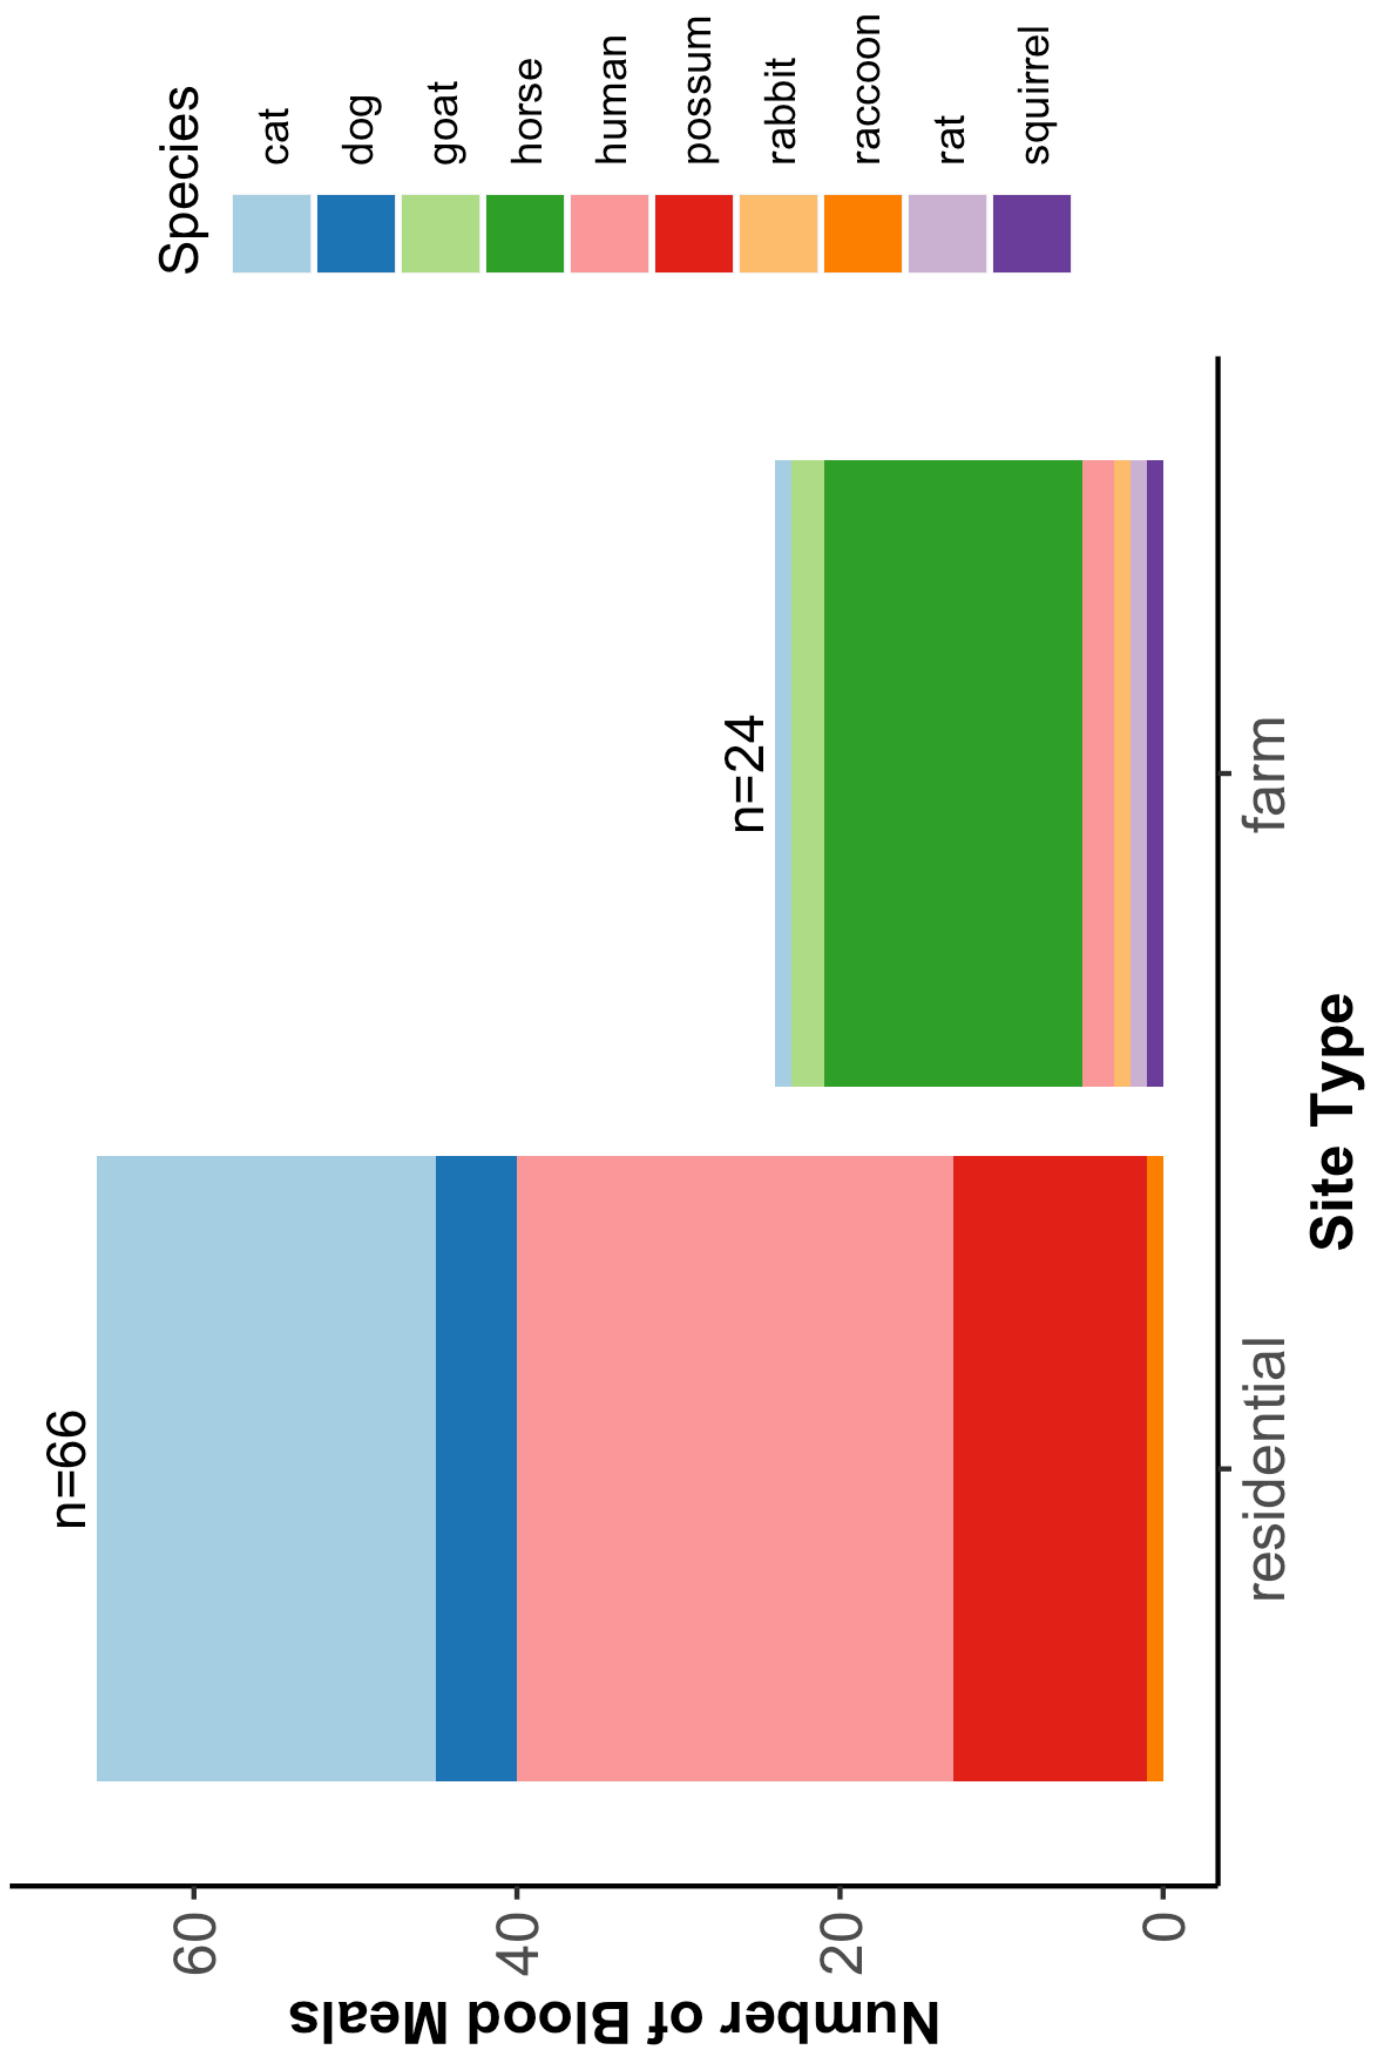

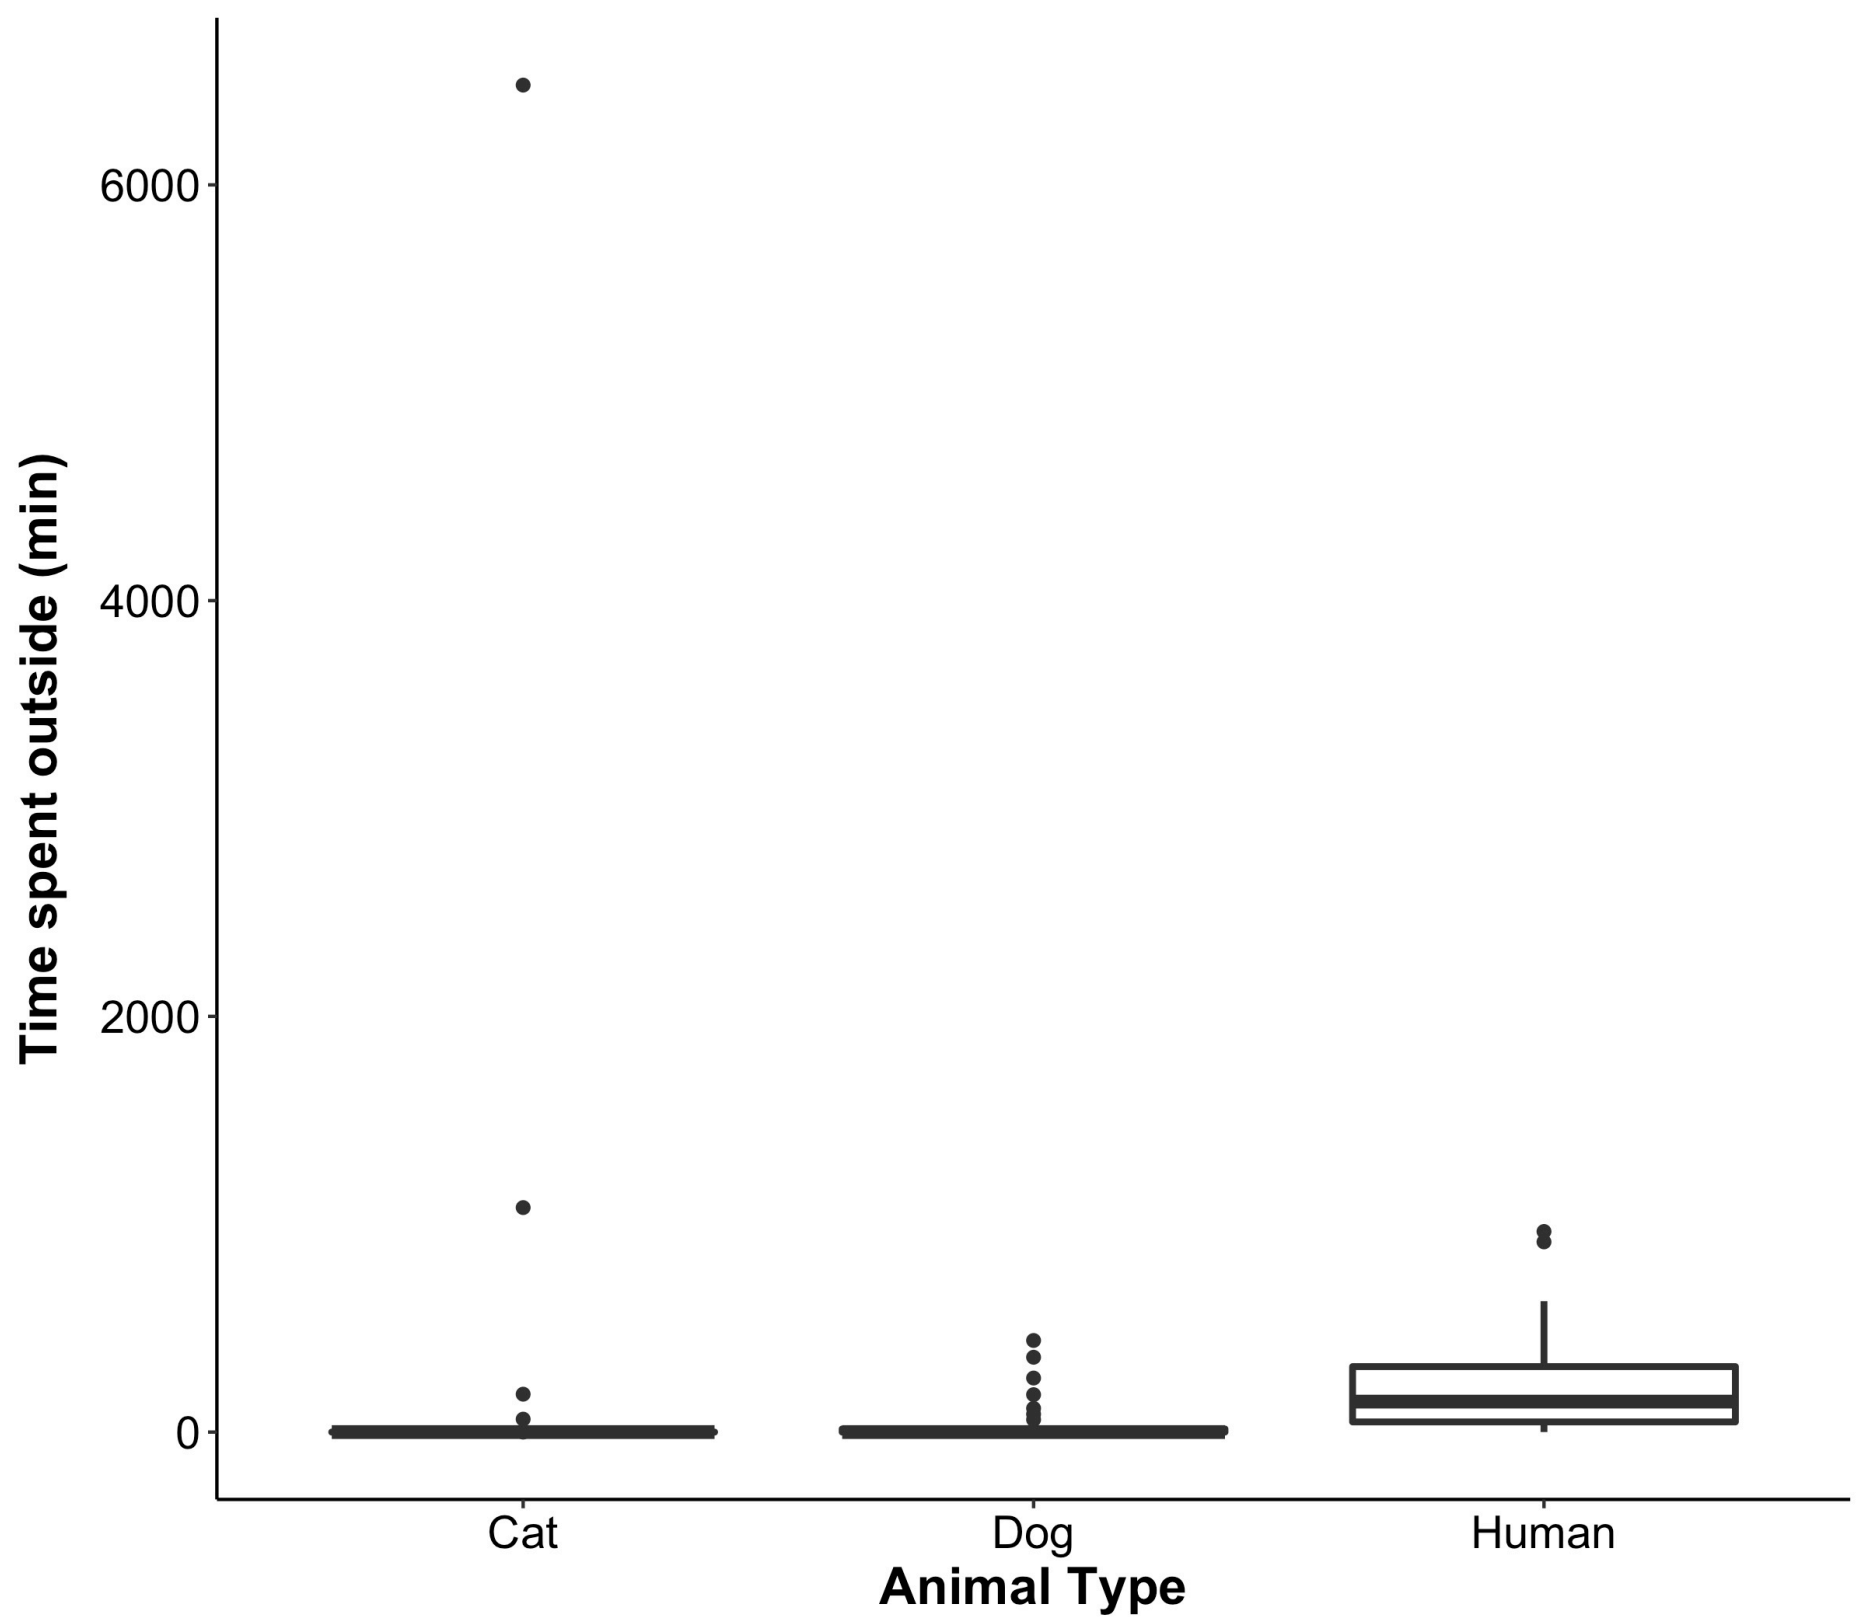

Supplement: tpmd210157.SD1.pdf [file tpmd210157.SD1.pdf]
